# Supplementary material for: Methylation of Wnt7a Is Modulated by DNMT1 and Cigarette Smoke Condensate in Non-Small Cell Lung Cancer
Source: PubMed Central journal article supplement (PMC3293913; doi:10.1371/journal.pone.0032921), 2012-03-05
Supplement: pone.0032921.s002.pdf [file pone.0032921.s002.pdf]

Table S1

| Human Wnt7a Methylation Analysis |               |        |        |        |        |        |        |         |         |         |         |         |         |         |
|----------------------------------|---------------|--------|--------|--------|--------|--------|--------|---------|---------|---------|---------|---------|---------|---------|
| Tumor                            | % Methylation |        |        |        |        |        |        |         |         |         |         |         |         |         |
| Sample ID                        | CpG #3        | CpG #4 | CpG #5 | CpG #6 | CpG #7 | CpG #8 | CpG #9 | CpG #10 | CpG #11 | CpG #12 | CpG #13 | CpG #14 | CpG #15 | CpG #16 |
| 1                                | 3.7           | 0.0    | 7.2    | 5.8    | 0.0    | 8.5    | 12.0   | 0.0     | 0.0     | 0.0     | 0.0     | 0.0     | 0.0     | 0.0     |
| 2                                | 2.5           | 2.7    | 4.3    | 3.0    | 2.0    | 4.1    | 7.4    | 0.0     | 0.0     | 0.0     | 0.0     | 0.0     | 0.0     | 0.0     |
| 3                                | 5.4           | 5.4    | 0.0    | 6.5    | 0.0    | 11.7   | 0.0    | 0.0     | 32.0    | 0.0     | 0.0     | 0.0     | 0.0     | 0.0     |
| 4                                | 2.4           | 2.4    | 2.9    | 3.8    | 0.0    | 3.2    | 6.5    | 0.0     | 0.0     | 0.0     | 0.0     | 0.0     | 0.0     | 0.0     |
| 5                                | 12.7          | 19.6   | 30.7   | 19.4   | 12.8   | 28.1   | 22.3   | 16.7    | 28.2    | 23.7    | 28.8    | 14.6    | 21.5    | 20.1    |
| 6                                | 0.0           | 3.2    | 2.6    | 3.2    | 0.0    | 5.7    | 7.7    | 0.0     | 10.9    | 0.0     | 0.0     | 0.0     | 0.0     | 0.0     |
| 7                                | 2.6           | 2.8    | 5.4    | 2.4    | 2.7    | 3.7    | 3.7    | 0.0     | 0.0     | 0.0     | 0.0     | 0.0     | 0.0     | 0.0     |
| 8                                | 4.5           | 3.1    | 5.5    | 3.2    | 2.7    | 6.1    | 7.3    | 0.0     | 0.0     | 0.0     | 0.0     | 0.0     | 0.0     | 0.0     |
| 9                                | 3.1           | 2.4    | 3.9    | 3.4    | 2.2    | 3.4    | 4.5    | 0.0     | 0.0     | 0.0     | 0.0     | 0.0     | 0.0     | 0.0     |
| 10                               | 1.5           | 1.3    | 3.0    | 2.2    | 0.8    | 2.9    | 3.8    | 0.0     | 0.0     | 0.0     | 0.0     | 0.0     | 0.0     | 0.0     |
| 11                               | 42.2          | 38.7   | 51.7   | 44.3   | 25.7   | 50.7   | 40.6   | 27.3    | 39.4    | 33.9    | 37.7    | 28.7    | 32.2    | 26.1    |
| 12                               | 6.4           | 5.3    | 8.7    | 6.1    | 4.5    | 8.4    | 6.1    | 9.0     | 14.4    | 0.0     | 0.0     | 0.0     | 0.0     | 10.4    |
| 13                               | 3.1           | 2.7    | 5.1    | 3.2    | 1.6    | 4.1    | 3.2    | 0.0     | 5.0     | 8.2     | 0.0     | 0.0     | 6.9     | 0.0     |
| 14                               | 4.1           | 3.0    | 8.7    | 4.0    | 1.8    | 4.0    | 6.0    | 0.0     | 0.0     | 0.0     | 0.0     | 0.0     | 0.0     | 0.0     |
| 15                               | 1.5           | 2.0    | 3.2    | 1.4    | 0.0    | 2.6    | 3.9    | 5.0     | 0.0     | 0.0     | 0.0     | 0.0     | 0.0     | 0.0     |
| 16                               | 5.5           | 5.0    | 8.9    | 6.6    | 5.7    | 7.3    | 6.4    | 5.6     | 8.1     | 6.4     | 0.0     | 7.9     | 9.5     | 8.7     |
| 17                               | 1.1           | 1.2    | 1.8    | 1.8    | 1.2    | 2.5    | 3.8    | 0.0     | 0.0     | 0.0     | 0.0     | 0.0     | 0.0     | 0.0     |
| 18                               | 2.0           | 1.5    | 4.1    | 2.0    | 0.0    | 3.6    | 5.7    | 0.0     | 0.0     | 0.0     | 0.0     | 0.0     | 0.0     | 0.0     |
| 19                               | 5.1           | 4.2    | 7.8    | 0.0    | 0.0    | 0.0    | 6.3    | 0.0     | 0.0     | 0.0     | 0.0     | 0.0     | 0.0     | 0.0     |
| 20                               | 4.1           | 3.1    | 6.0    | 0.0    | 0.0    | 0.0    | 5.3    | 0.0     | 10.1    | 0.0     | 0.0     | 0.0     | 0.0     | 0.0     |
| 21                               | 2.9           | 6.4    | 8.1    | 5.6    | 5.0    | 8.3    | 6.1    | 5.1     | 0.0     | 7.2     | 7.4     | 0.0     | 9.8     | 0.0     |
| 22                               | 7.4           | 4.6    | 8.1    | 6.5    | 7.3    | 11.8   | 9.4    | 7.1     | 7.6     | 8.0     | 0.0     | 0.0     | 14.2    | 0.0     |
| 23                               | 32.6          | 32.1   | 35.9   | 33.6   | 31.7   | 35.6   | 32.3   | 27.3    | 34.7    | 30.2    | 29.3    | 25.6    | 27.4    | 21.8    |
| 24                               | 2.8           | 3.0    | 7.9    | 4.0    | 0.0    | 4.7    | 8.0    | 7.2     | 0.0     | 0.0     | 0.0     | 0.0     | 0.0     | 0.0     |
| 25                               | 10.1          | 7.4    | 11.8   | 8.8    | 3.5    | 10.8   | 11.1   | 10.8    | 10.7    | 14.5    | 0.0     | 8.0     | 12.6    | 11.4    |
| 26                               | 5.6           | 3.9    | 8.1    | 3.9    | 2.2    | 5.3    | 4.7    | 0.0     | 0.0     | 10.4    | 7.8     | 0.0     | 12.2    | 12.9    |
| 27                               | 2.8           | 2.4    | 2.3    | 1.9    | 1.4    | 4.2    | 4.4    | 0.0     | 0.0     | 0.0     | 0.0     | 0.0     | 0.0     | 0.0     |
| 28                               | 3.9           | 3.1    | 5.4    | 2.5    | 1.7    | 5.7    | 6.9    | 6.9     | 0.0     | 8.3     | 0.0     | 0.0     | 22.6    | 0.0     |
| 29                               | 29.3          | 30.7   | 32.1   | 30.9   | 28.6   | 28.9   | 29.0   | 26.3    | 28.9    | 26.9    | 30.4    | 24.6    | 28.7    | 18.1    |
| 30                               | 0.0           | 3.5    | 5.8    | 4.2    | 0.0    | 0.0    | 6.5    | 0.0     | 0.0     | 0.0     | 0.0     | 0.0     | 0.0     | 0.0     |
| 31                               | 0.0           | 9.1    | 11.8   | 18.6   | 13.1   | 18.8   | 13.9   | 0.0     | 21.2    | 0.0     | 0.0     | 0.0     | 0.0     | 0.0     |
| 32                               | 3.1           | 2.0    | 5.1    | 1.4    | 1.4    | 3.2    | 4.6    | 0.0     | 0.0     | 0.0     | 0.0     | 0.0     | 0.0     | 0.0     |
| 33                               | 10.1          | 12.3   | 12.5   | 10.1   | 7.5    | 12.2   | 9.1    | 5.3     | 0.0     | 0.0     | 13.8    | 0.0     | 0.0     | 0.0     |
| 34                               | 6.5           | 3.5    | 6.1    | 6.0    | 4.3    | 5.6    | 6.1    | 5.3     | 5.9     | 4.0     | 6.3     | 4.6     | 11.0    | 7.8     |

|    |      |      |      |      |      |      |      |      |      |      |      |      |      |      |
|----|------|------|------|------|------|------|------|------|------|------|------|------|------|------|
| 35 | 1.8  | 2.2  | 4.4  | 2.1  | 2.1  | 3.9  | 4.6  | 3.3  | 4.4  | 0.0  | 0.0  | 0.0  | 0.0  | 0.0  |
| 36 | 5.8  | 10.5 | 17.9 | 10.0 | 7.4  | 15.1 | 13.2 | 9.8  | 13.2 | 8.5  | 11.8 | 9.3  | 16.9 | 8.4  |
| 37 | 5.3  | 4.5  | 7.5  | 2.5  | 5.9  | 3.8  | 0.0  | 0.0  | 0.0  | 0.0  | 0.0  | 0.0  | 0.0  | 0.0  |
| 38 | 3.1  | 1.9  | 4.8  | 2.2  | 2.0  | 2.4  | 3.4  | 0.0  | 0.0  | 0.0  | 0.0  | 0.0  | 0.0  | 0.0  |
| 39 | 2.9  | 2.8  | 5.2  | 4.3  | 2.4  | 3.9  | 4.6  | 2.9  | 7.6  | 9.0  | 9.4  | 0.0  | 0.0  | 0.0  |
| 40 | 2.5  | 6.4  | 8.4  | 7.3  | 5.4  | 6.7  | 9.0  | 7.1  | 7.9  | 6.9  | 7.4  | 5.3  | 5.8  | 0.0  |
| 41 | 6.0  | 4.0  | 7.8  | 5.4  | 5.6  | 6.2  | 8.0  | 3.9  | 5.5  | 5.7  | 0.0  | 6.3  | 0.0  | 0.0  |
| 42 | 1.4  | 1.1  | 1.6  | 1.7  | 1.3  | 0.0  | 4.0  | 0.0  | 0.0  | 0.0  | 0.0  | 0.0  | 0.0  | 0.0  |
| 43 | 1.7  | 2.2  | 3.3  | 1.7  | 2.3  | 2.3  | 4.1  | 0.0  | 0.0  | 0.0  | 7.2  | 0.0  | 0.0  | 0.0  |
| 44 | 3.9  | 3.9  | 4.4  | 4.3  | 3.8  | 4.4  | 7.6  | 0.0  | 7.2  | 0.0  | 0.0  | 7.9  | 0.0  | 0.0  |
| 45 | 5.3  | 5.0  | 9.4  | 6.3  | 3.9  | 17.1 | 7.1  | 16.1 | 26.7 | 28.1 | 22.4 | 19.5 | 33.3 | 20.9 |
| 46 | 7.1  | 7.6  | 7.3  | 6.9  | 6.8  | 7.0  | 7.0  | 6.8  | 7.7  | 7.1  | 7.9  | 5.8  | 7.7  | 5.2  |
| 47 | 3.3  | 2.9  | 3.2  | 2.9  | 2.4  | 5.3  | 3.4  | 4.3  | 3.0  | 5.8  | 2.9  | 2.3  | 3.3  | 3.5  |
| 48 | 17.3 | 13.8 | 38.0 | 22.9 | 9.4  | 34.5 | 16.3 | 21.9 | 20.0 | 17.7 | 15.1 | 11.3 | 20.0 | 17.0 |
| 49 | 4.8  | 2.6  | 4.7  | 3.4  | 2.6  | 4.1  | 2.9  | 3.3  | 3.9  | 4.3  | 4.0  | 2.5  | 4.3  | 2.2  |
| 50 | 4.8  | 1.6  | 6.8  | 1.8  | 4.5  | 5.5  | 5.1  | 6.2  | 5.8  | 5.1  | 7.9  | 5.3  | 5.2  | 3.3  |
| 51 | 2.0  | 2.1  | 1.1  | 0.8  | 1.5  | 2.3  | 2.1  | 2.4  | 3.2  | 1.9  | 1.5  | 0.7  | 2.8  | 1.3  |
| 52 | 1.5  | 1.7  | 1.4  | 1.1  | 0.0  | 2.0  | 1.8  | 2.5  | 1.4  | 3.0  | 1.6  | 1.2  | 3.3  | 0.0  |
| 53 | 3.6  | 3.6  | 4.5  | 3.4  | 2.0  | 4.0  | 2.8  | 4.3  | 2.9  | 4.5  | 4.0  | 2.1  | 4.9  | 2.2  |
| 54 | 2.3  | 1.0  | 0.0  | 0.0  | 1.8  | 1.0  | 1.3  | 1.2  | 1.4  | 1.3  | 1.6  | 1.8  | 2.0  | 0.0  |
| 55 | 3.3  | 3.0  | 2.3  | 1.8  | 1.3  | 3.5  | 2.5  | 3.3  | 3.4  | 1.7  | 0.0  | 0.0  | 3.9  | 0.0  |
| 56 | 4.5  | 4.0  | 3.6  | 2.3  | 1.4  | 3.4  | 1.7  | 2.6  | 2.5  | 2.6  | 2.1  | 0.9  | 7.4  | 1.0  |
| 57 | 6.2  | 7.5  | 10.9 | 8.7  | 5.3  | 11.8 | 5.2  | 10.5 | 8.1  | 9.3  | 10.5 | 6.7  | 8.8  | 6.7  |
| 58 | 31.7 | 33.4 | 37.7 | 32.3 | 27.2 | 41.4 | 31.5 | 34.0 | 34.2 | 35.7 | 32.2 | 26.0 | 36.2 | 24.1 |
| 59 | 2.7  | 2.9  | 3.0  | 2.8  | 2.6  | 4.4  | 1.3  | 3.5  | 1.8  | 4.2  | 2.0  | 1.4  | 3.4  | 2.2  |
| 60 | 6.3  | 4.2  | 12.5 | 7.5  | 6.8  | 9.6  | 8.4  | 9.5  | 10.4 | 7.7  | 8.5  | 6.2  | 9.0  | 7.5  |
| 61 | 4.8  | 8.1  | 16.6 | 8.7  | 14.9 | 15.6 | 13.7 | 16.1 | 9.8  | 10.0 | 9.5  | 7.5  | 17.6 | 8.4  |
| 62 | 4.6  | 3.9  | 5.3  | 1.2  | 2.3  | 5.8  | 3.9  | 4.9  | 4.6  | 6.4  | 5.7  | 1.8  | 5.6  | 3.3  |
| 63 | 3.3  | 2.6  | 1.2  | 2.2  | 1.6  | 2.4  | 2.9  | 1.4  | 3.2  | 1.3  | 2.1  | 0.0  | 3.4  | 1.5  |

|                        |    |    |    |    |    |    |    |    |    |    |    |    |    |    |
|------------------------|----|----|----|----|----|----|----|----|----|----|----|----|----|----|
| %<br>methylated<br>>0% | 95 | 98 | 96 | 95 | 82 | 93 | 96 | 60 | 61 | 55 | 47 | 44 | 52 | 41 |
|------------------------|----|----|----|----|----|----|----|----|----|----|----|----|----|----|

| Human Wnt7a Methylation Analysis |               |        |        |        |        |        |        |         |         |         |         |         |         |         |
|----------------------------------|---------------|--------|--------|--------|--------|--------|--------|---------|---------|---------|---------|---------|---------|---------|
| Normal                           | % Methylation |        |        |        |        |        |        |         |         |         |         |         |         |         |
| Sample ID                        | CpG #3        | CpG #4 | CpG #5 | CpG #6 | CpG #7 | CpG #8 | CpG #9 | CpG #10 | CpG #11 | CpG #12 | CpG #13 | CpG #14 | CpG #15 | CpG #16 |
| 1                                | 0.0           | 0.0    | 6.3    | 0.0    | 0.0    | 0.0    | 14.2   | 0.0     | 0.0     | 0.0     | 0.0     | 0.0     | 0.0     | 0.0     |
| 2                                | 2.6           | 1.5    | 1.3    | 1.1    | 1.4    | 2.7    | 4.7    | 0.0     | 0.0     | 0.0     | 0.0     | 0.0     | 0.0     | 0.0     |
| 3                                | 1.2           | 1.9    | 0.9    | 1.9    | 1.9    | 5.6    | 0.0    | 0.0     | 0.0     | 0.0     | 0.0     | 0.0     | 0.0     | 0.0     |
| 4                                | 2.1           | 2.4    | 4.1    | 1.9    | 1.5    | 4.2    | 4.7    | 0.0     | 0.0     | 0.0     | 0.0     | 0.0     | 0.0     | 0.0     |
| 5                                | 4.7           | 5.0    | 5.3    | 0.0    | 0.0    | 5.5    | 8.7    | 8.2     | 0.0     | 0.0     | 23.4    | 0.0     | 0.0     | 0.0     |
| 6                                | 2.6           | 2.7    | 5.2    | 2.6    | 2.8    | 6.3    | 4.3    | 3.9     | 7.5     | 7.8     | 0.0     | 6.4     | 0.0     | 0.0     |
| 7                                | 1.6           | 1.7    | 4.8    | 2.2    | 0.0    | 3.0    | 3.1    | 0.0     | 8.3     | 0.0     | 0.0     | 0.0     | 10.5    | 0.0     |
| 8                                | 2.7           | 2.2    | 6.3    | 2.6    | 1.8    | 4.6    | 0.0    | 0.0     | 0.0     | 0.0     | 0.0     | 0.0     | 0.0     | 0.0     |
| 9                                | 3.0           | 3.1    | 7.7    | 2.2    | 1.7    | 6.8    | 7.4    | 8.6     | 0.0     | 7.8     | 0.0     | 9.9     | 0.0     | 0.0     |
| 10                               | 1.5           | 1.5    | 2.7    | 1.9    | 1.3    | 2.1    | 3.1    | 0.0     | 5.7     | 0.0     | 0.0     | 0.0     | 0.0     | 0.0     |
| 11                               | 2.1           | 1.9    | 3.0    | 1.1    | 1.5    | 3.7    | 3.5    | 5.1     | 8.0     | 0.0     | 0.0     | 0.0     | 0.0     | 0.0     |
| 12                               | 0.0           | 0.0    | 3.5    | 2.7    | 0.0    | 0.0    | 5.3    | 0.0     | 0.0     | 0.0     | 0.0     | 10.8    | 0.0     | 0.0     |
| 13                               | 2.0           | 2.1    | 5.0    | 1.8    | 0.0    | 0.0    | 5.1    | 0.0     | 0.0     | 0.0     | 0.0     | 0.0     | 0.0     | 0.0     |
| 14                               | 2.1           | 2.9    | 6.2    | 0.0    | 0.0    | 0.0    | 5.3    | 0.0     | 0.0     | 0.0     | 0.0     | 0.0     | 0.0     | 0.0     |
| 15                               | 3.2           | 3.4    | 6.3    | 3.3    | 0.0    | 3.2    | 5.2    | 0.0     | 0.0     | 0.0     | 0.0     | 0.0     | 0.0     | 0.0     |
| 16                               | 2.0           | 1.8    | 4.1    | 0.0    | 1.0    | 2.8    | 4.3    | 0.0     | 0.0     | 0.0     | 0.0     | 0.0     | 0.0     | 0.0     |
| 17                               | 1.1           | 2.6    | 0.0    | 0.0    | 0.0    | 2.1    | 5.6    | 0.0     | 0.0     | 0.0     | 0.0     | 0.0     | 0.0     | 0.0     |
| 18                               | 3.4           | 1.2    | 4.9    | 2.5    | 1.5    | 4.9    | 3.8    | 2.5     | 4.6     | 4.0     | 0.0     | 0.0     | 0.0     | 0.0     |
| 19                               | 3.2           | 1.9    | 5.4    | 2.1    | 2.2    | 2.6    | 3.4    | 4.5     | 0.0     | 0.0     | 0.0     | 0.0     | 0.0     | 0.0     |
| 20                               | 3.8           | 4.0    | 6.9    | 4.3    | 2.5    | 7.0    | 6.2    | 5.2     | 6.5     | 8.4     | 0.0     | 0.0     | 0.0     | 0.0     |
| 21                               | 2.2           | 1.5    | 3.4    | 1.6    | 0.0    | 2.5    | 3.5    | 3.1     | 0.0     | 4.7     | 0.0     | 0.0     | 0.0     | 0.0     |
| 22                               | 1.3           | 5.1    | 7.1    | 4.8    | 4.7    | 6.2    | 6.5    | 5.4     | 5.6     | 0.0     | 0.0     | 0.0     | 8.3     | 7.8     |
| 23                               | 0.0           | 0.0    | 0.0    | 0.0    | 0.0    | 0.0    | 5.6    | 0.0     | 0.0     | 0.0     | 0.0     | 0.0     | 0.0     | 0.0     |
| 24                               | 3.0           | 3.2    | 5.5    | 4.2    | 0.0    | 2.3    | 3.7    | 0.0     | 0.0     | 0.0     | 0.0     | 0.0     | 0.0     | 0.0     |
| 25                               | 4.5           | 4.9    | 11.7   | 5.3    | 3.5    | 5.1    | 6.2    | 0.0     | 0.0     | 0.0     | 0.0     | 0.0     | 0.0     | 0.0     |
| 26                               | 3.5           | 3.4    | 5.9    | 2.3    | 0.0    | 3.8    | 5.3    | 0.0     | 0.0     | 0.0     | 0.0     | 0.0     | 0.0     | 0.0     |
| 27                               | 2.3           | 3.2    | 4.2    | 1.9    | 1.8    | 3.1    | 3.8    | 0.0     | 0.0     | 0.0     | 0.0     | 0.0     | 0.0     | 0.0     |
| 28                               | 2.4           | 0.0    | 2.1    | 0.0    | 1.2    | 1.7    | 3.9    | 0.0     | 0.0     | 0.0     | 0.0     | 0.0     | 0.0     | 0.0     |
| 29                               | 1.7           | 1.2    | 2.5    | 2.8    | 1.6    | 1.6    | 3.0    | 2.8     | 3.0     | 0.0     | 0.0     | 0.0     | 0.0     | 0.0     |
| 30                               | 3.5           | 3.3    | 5.0    | 2.5    | 2.0    | 2.5    | 4.6    | 10.3    | 0.0     | 0.0     | 0.0     | 0.0     | 0.0     | 0.0     |
| 31                               | 0.0           | 0.0    | 12.2   | 0.0    | 0.0    | 0.0    | 6.5    | 0.0     | 0.0     | 0.0     | 8.1     | 0.0     | 0.0     | 0.0     |
| 32                               | 2.4           | 3.7    | 4.3    | 2.7    | 1.5    | 4.0    | 5.0    | 0.0     | 0.0     | 0.0     | 0.0     | 0.0     | 0.0     | 0.0     |
| 33                               | 1.7           | 2.3    | 4.0    | 1.7    | 1.6    | 3.3    | 0.0    | 0.0     | 0.0     | 0.0     | 0.0     | 0.0     | 0.0     | 0.0     |
| 34                               | 0.0           | 1.2    | 2.2    | 2.3    | 0.0    | 2.9    | 0.0    | 0.0     | 11.1    | 0.0     | 0.0     | 0.0     | 20.1    | 0.0     |
| 35                               | 1.0           | 1.7    | 1.3    | 1.1    | 1.5    | 2.9    | 2.6    | 0.0     | 0.0     | 0.0     | 0.0     | 0.0     | 0.0     | 0.0     |
| 36                               | 3.6           | 3.0    | 3.7    | 2.8    | 2.0    | 2.4    | 3.9    | 2.9     | 0.0     | 0.0     | 0.0     | 0.0     | 0.0     | 0.0     |

|    |     |     |     |     |     |     |      |      |     |     |      |     |     |     |     |
|----|-----|-----|-----|-----|-----|-----|------|------|-----|-----|------|-----|-----|-----|-----|
| 37 | 2.5 | 3.2 | 6.9 | 3.9 | 0.0 | 3.4 | 4.8  | 0.0  | 0.0 | 0.0 | 0.0  | 0.0 | 0.0 | 0.0 | 0.0 |
| 38 | 3.5 | 2.4 | 5.8 | 1.8 | 1.8 | 3.3 | 4.2  | 0.0  | 0.0 | 0.0 | 0.0  | 0.0 | 0.0 | 0.0 | 0.0 |
| 39 | 3.5 | 0.0 | 0.0 | 0.0 | 0.0 | 0.0 | 15.8 | 0.0  | 0.0 | 0.0 | 0.0  | 0.0 | 0.0 | 0.0 | 0.0 |
| 40 | 2.0 | 1.3 | 2.1 | 0.0 | 3.0 | 2.2 | 3.4  | 0.0  | 0.0 | 0.0 | 0.0  | 0.0 | 0.0 | 0.0 | 0.0 |
| 41 | 1.5 | 0.0 | 2.8 | 1.9 | 1.8 | 4.1 | 5.5  | 0.0  | 0.0 | 0.0 | 10.3 | 0.0 | 0.0 | 0.0 | 0.0 |
| 42 | 3.3 | 0.8 | 3.6 | 3.1 | 2.6 | 3.6 | 3.3  | 0.0  | 0.0 | 0.0 | 0.0  | 0.0 | 0.0 | 0.0 | 0.0 |
| 43 | 1.3 | 2.8 | 4.1 | 5.1 | 1.7 | 2.7 | 5.4  | 6.0  | 0.0 | 0.0 | 0.0  | 0.0 | 0.0 | 0.0 | 0.0 |
| 44 | 2.4 | 2.0 | 2.2 | 2.0 | 1.9 | 0.0 | 0.0  | 0.0  | 0.0 | 0.0 | 0.0  | 0.0 | 0.0 | 0.0 | 0.0 |
| 45 | 1.9 | 1.8 | 2.0 | 2.1 | 1.1 | 2.9 | 1.4  | 2.1  | 1.9 | 4.2 | 3.6  | 2.1 | 5.0 | 3.5 |     |
| 46 | 5.7 | 0.9 | 1.0 | 0.0 | 0.0 | 1.4 | 3.3  | 3.1  | 1.0 | 5.6 | 1.9  | 4.1 | 2.4 | 0.7 |     |
| 47 | 1.4 | 1.7 | 0.8 | 0.0 | 0.0 | 1.6 | 1.5  | 4.6  | 1.6 | 1.7 | 2.0  | 0.0 | 4.9 | 1.1 |     |
| 48 | 1.1 | 2.6 | 0.0 | 0.0 | 0.0 | 1.2 | 1.6  | 1.7  | 0.0 | 3.9 | 4.8  | 0.0 | 0.0 | 2.8 |     |
| 49 | 3.7 | 1.2 | 2.5 | 2.5 | 1.3 | 5.9 | 2.0  | 3.6  | 1.6 | 3.8 | 3.4  | 2.4 | 3.9 | 1.0 |     |
| 50 | 2.5 | 0.0 | 4.1 | 0.0 | 1.4 | 9.5 | 2.6  | 0.0  | 2.8 | 0.0 | 0.0  | 0.0 | 1.8 | 0.0 |     |
| 51 | 1.2 | 4.2 | 2.3 | 0.9 | 5.5 | 3.6 | 4.5  | 11.7 | 3.5 | 4.2 | 3.4  | 2.7 | 2.9 | 2.4 |     |
| 52 | 2.9 | 1.3 | 3.4 | 1.9 | 1.8 | 3.6 | 1.5  | 3.7  | 2.5 | 2.8 | 2.2  | 1.5 | 3.5 | 1.6 |     |
| 53 | 2.7 | 2.3 | 2.6 | 0.0 | 0.0 | 2.0 | 1.9  | 0.0  | 2.4 | 2.0 | 1.7  | 1.4 | 2.9 | 1.3 |     |
| 54 | 2.3 | 1.1 | 1.6 | 0.0 | 8.8 | 2.5 | 1.4  | 2.2  | 2.1 | 8.4 | 0.0  | 1.9 | 4.5 | 0.0 |     |
| 55 | 2.5 | 1.5 | 2.6 | 1.8 | 1.6 | 3.0 | 2.3  | 3.7  | 3.0 | 2.5 | 4.7  | 1.7 | 2.8 | 1.4 |     |
| 56 | 1.8 | 1.8 | 2.7 | 0.8 | 1.3 | 2.5 | 1.7  | 1.9  | 1.4 | 2.7 | 2.9  | 2.0 | 2.3 | 1.2 |     |
| 57 | 1.7 | 3.1 | 3.7 | 2.3 | 1.0 | 3.8 | 1.7  | 4.6  | 2.0 | 4.1 | 3.5  | 1.4 | 4.5 | 1.3 |     |
| 58 | 2.2 | 4.3 | 4.7 | 2.5 | 2.5 | 2.7 | 2.0  | 3.2  | 2.5 | 4.0 | 2.7  | 1.7 | 3.9 | 2.1 |     |
| 59 | 1.3 | 3.7 | 1.7 | 2.2 | 2.0 | 5.8 | 2.0  | 2.7  | 0.0 | 3.5 | 2.6  | 0.0 | 2.5 | 1.2 |     |
| 60 | 2.9 | 2.4 | 1.7 | 1.4 | 0.0 | 2.6 | 2.4  | 0.0  | 2.1 | 3.2 | 3.1  | 0.0 | 0.0 | 0.0 |     |
| 61 | 0.0 | 3.9 | 0.0 | 0.0 | 0.0 | 0.0 | 0.0  | 0.0  | 0.0 | 0.0 | 7.9  | 0.0 | 0.0 | 0.0 |     |
| 62 | 2.3 | 3.5 | 2.2 | 0.0 | 0.0 | 4.0 | 3.1  | 0.0  | 2.9 | 3.7 | 3.9  | 0.0 | 0.0 | 0.0 |     |
| 63 | 2.3 | 3.7 | 2.4 | 2.2 | 1.6 | 4.4 | 2.7  | 3.8  | 2.0 | 3.8 | 2.2  | 0.8 | 2.1 | 1.1 |     |

|                        |    |    |    |    |    |    |    |    |    |    |    |    |    |    |
|------------------------|----|----|----|----|----|----|----|----|----|----|----|----|----|----|
| %<br>methylated<br>>0% | 90 | 87 | 92 | 71 | 63 | 85 | 90 | 42 | 39 | 34 | 31 | 23 | 28 | 23 |
|------------------------|----|----|----|----|----|----|----|----|----|----|----|----|----|----|

|                  |      |      |      |      |     |      |      |      |      |      |      |      |      |      |
|------------------|------|------|------|------|-----|------|------|------|------|------|------|------|------|------|
| Tumor/<br>normal | 1.05 | 1.13 | 1.04 | 1.34 | 1.3 | 1.09 | 1.07 | 1.43 | 1.56 | 1.62 | 1.77 | 1.91 | 1.86 | 1.78 |
|------------------|------|------|------|------|-----|------|------|------|------|------|------|------|------|------|
